# Supplementary material for: Mechanisms of activation of mouse and human enteroendocrine cells by nutrients
Source: PubMed Central journal article supplement (PMC4392230; doi:10.1136/gutjnl-2014-306834), 2014-07-11
Supplement: gutjnl-2014-306834-s1.pdf [file gutjnl-2014-306834-s1.pdf]

# Supplementary Data. Symonds et al. Gut

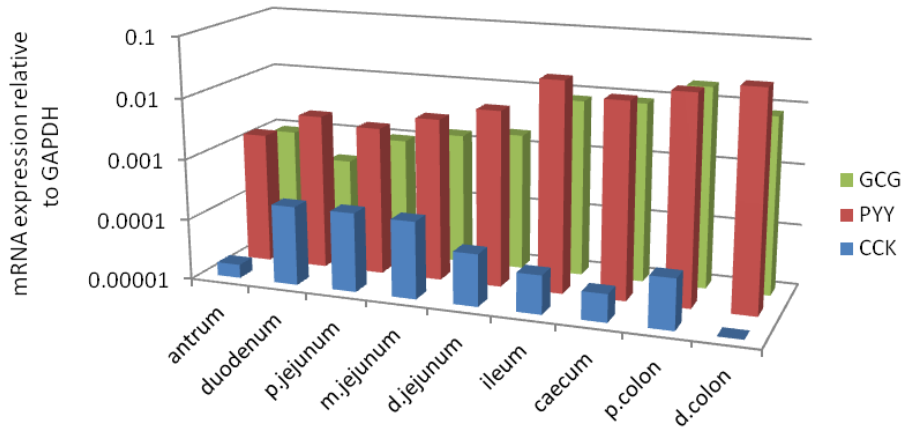

**Fig S1.** Regional expression of cholecystokinin (CCK), peptide YY (PYY) and proglucagon (GCG) in mouse mucosa. Data are expressed relative to GAPDH expression (n = 7).

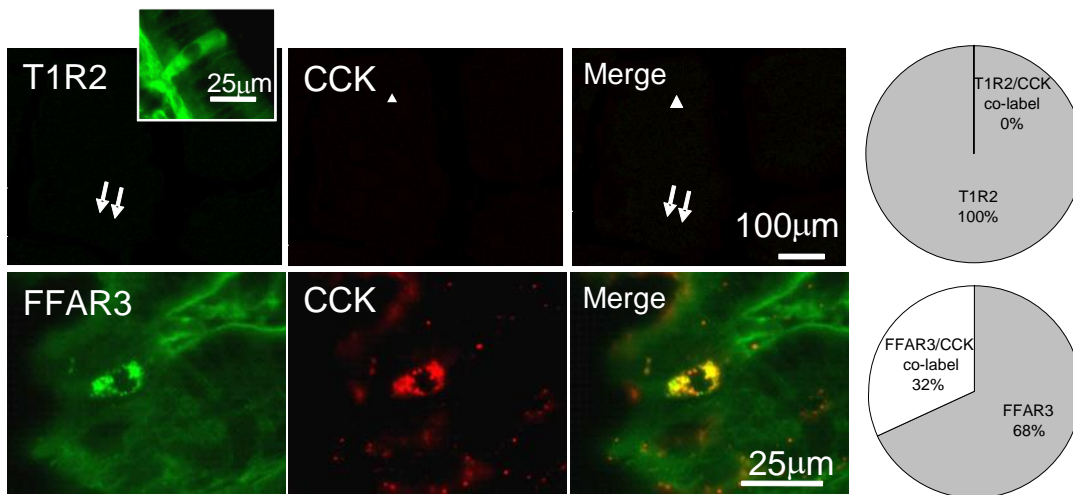

**Fig S2.** Double immunolabelling in mouse proximal jejunum for T1R2 and CCK T1R2, and FFAR3 and CCK, and pie charts showing extent of co-localization. Inset shows higher magnification of T1R2 labelling.

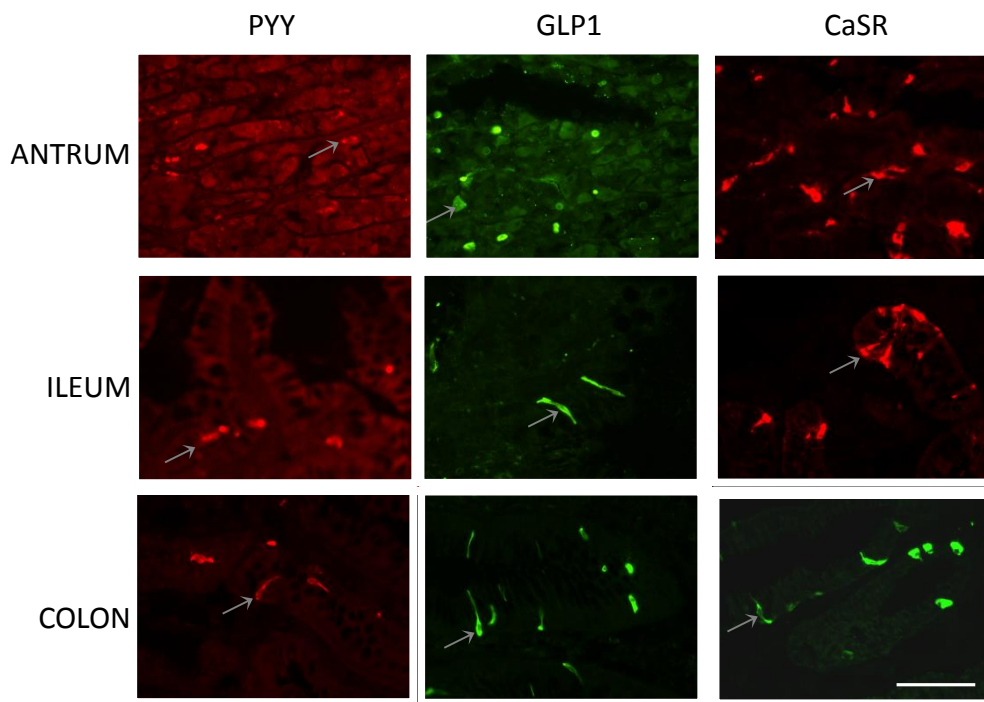

**Fig S 3.** CaSR-immunoreactive (IR) cells in human antrum, ileum and colon. GLP-1 and PYY-IR is shown for comparison. CaSR positive cells were generally found in clusters and cells that were adjacent were often observed. These cells were found mostly within the deeper layers of gastric glands but were also seen close to the surface around gastric pits. They were more compact and less elongated than those in the intestine, which may suggest a closed phenotype. CaSR-IR cells in the ileum and colon were found superficially within the villi and crypts, respectively. CaSR-IR cells of the colon had similar morphology to those of the ileum although there were significantly fewer CaSR-IR cells in the colon compared to the antrum or ileum. Scale bar = 20  $\mu$ m

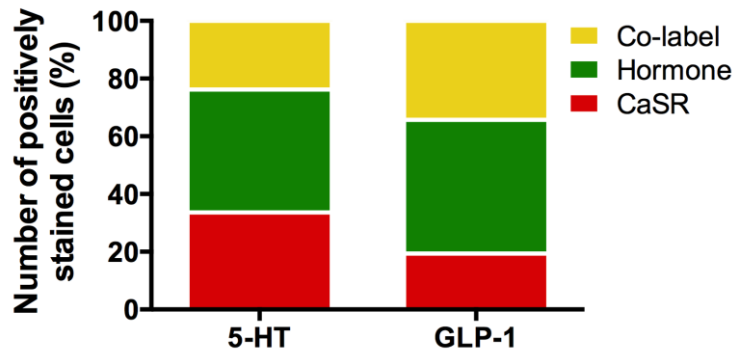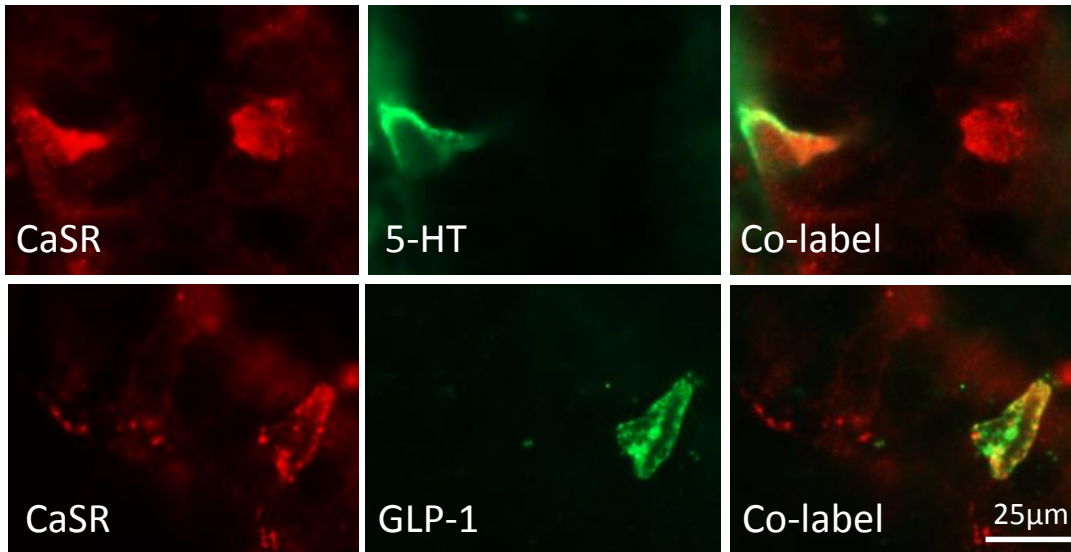

**Fig S 4.** CaSR-immunoreactive (IR) cells in mouse proximal colon, and colocalisation with 5-HT and GLP-1. Proportions are shown in the graph of co-labelled (yellow), 5-HT or GLP-1 alone (green) or CaSR alone (red) cells. Scale bar = 25  $\mu$ m

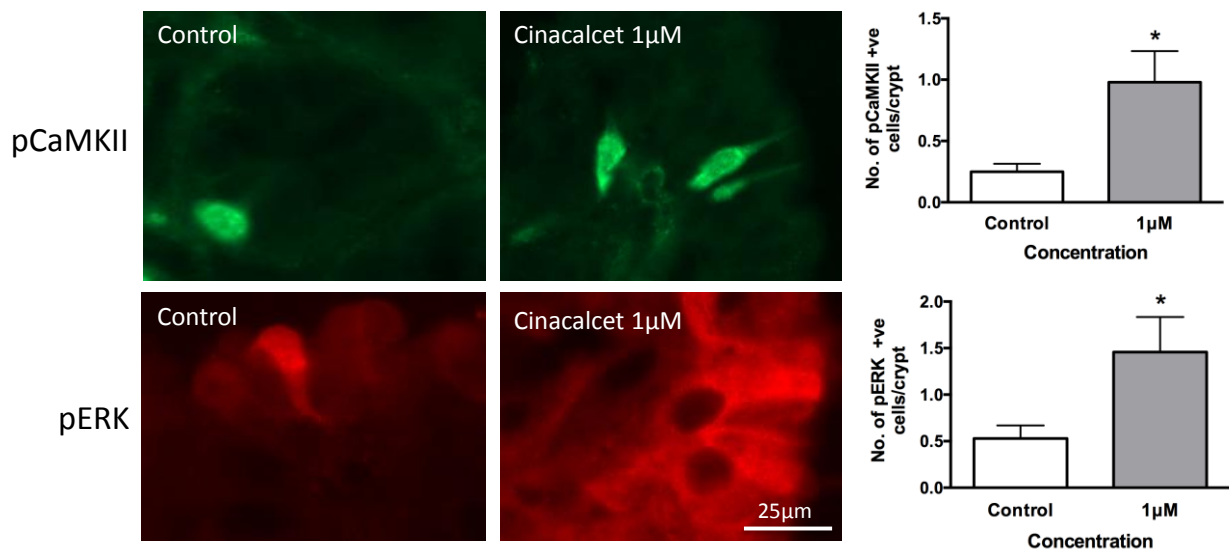

**Fig S 5.** Cells labelled for pCaMKII or pERK in mouse colon in either control conditions, or after exposure to Cinacalcet. Significant increases were seen in both markers (\*  $P < 0.05$ , t-test). Scale bar = 25 µm

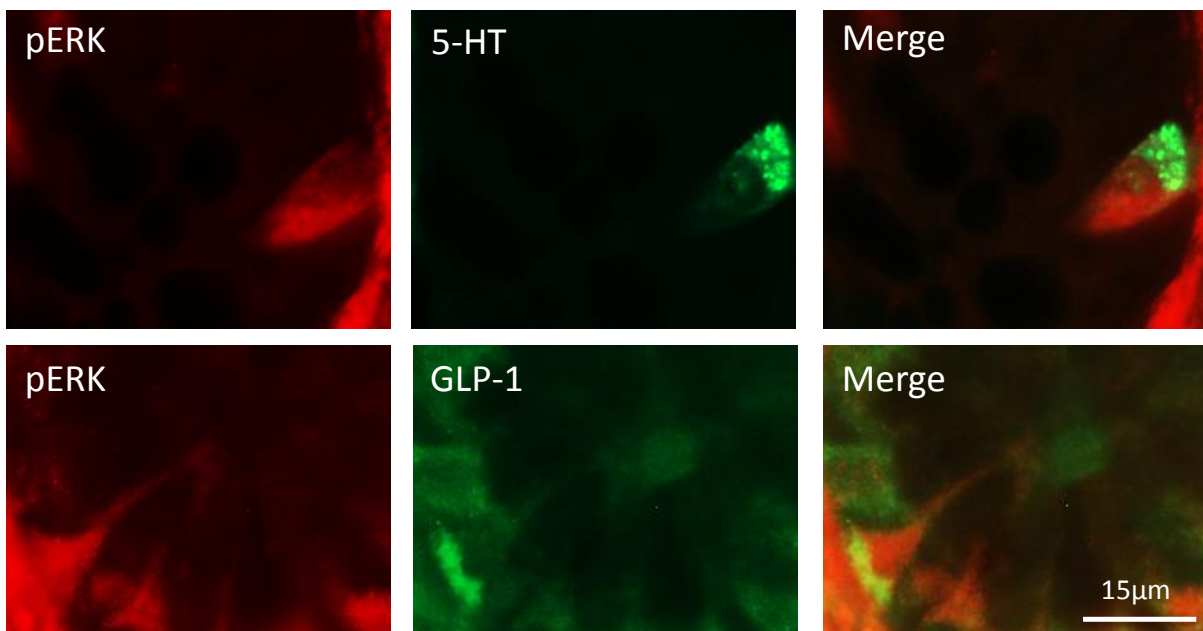

**Fig S 6.** Cells labelled for pERK in human ascending colon after exposure to Lauric acid (25mM). Activation was seen in both 5-HT and GLP-1 – immunoreactive cells. Scale bar = 15 µm

**SUPPLEMENTARY TABLE 2.** Primer sequences used for RT-PCR.

| <b>Mouse primers</b> |                                  |                                  |
|----------------------|----------------------------------|----------------------------------|
|                      | <b>Forward primer (5' to 3')</b> | <b>Reverse primer (5' to 3')</b> |
| FFAR3                | CGCAAGAGGATAATGGGG               | GAGTTGAGGGTGCTGAGGAG             |
| FFAR2                | GAACTTCACCCAAGAGCAGC             | TAAGAAGCGTCACAACAGCC             |
| GPR84                | AGGTGACCCGTATGTGCTTC             | TGTTGAGCCAGGTGAGGTTG             |
| GPR119               | ATTCCAGCAGACCACCTACC             | GCACAGAGGCAATCTTGAGC             |
| GPR120               | TGCCGGGACTGGTCATT                | GTTGGGACACTCGGATCTG              |
| T1R1                 | GATGCCCTGGTCAGCTATG              | GCAGCCGCACTATGACTTCC             |
| T1R3                 | CATTACAGGCAAGTTCTTCAGC           | TCACTCCCTAAGGCGGC                |
| CaSR                 | GCATCAGGTATAACTCCGTGG            | TTGGAGACGGTGTACAGGTG             |
| mGluR4               | CGTCCAATGCCAGAGCC                | TTGGGAAGAATGGTGACTGC             |
| GPRC6A               | GCCACAGGTGAGTTATGAATCC           | CCAATCCAGTTCATCCCCG              |
| GPR93                | GCTGTCTCTATTTCGTCTGGC            | CGAAGCACAGCAGGAAGATG             |
| TGR5                 | CTGCTGGCTGCTTCTTCC               | CACTGCCATGTAGCGTTCC              |
| PYY                  | CAATGCTGCTAATCCTGCTCG            | TTTGGAGAACAGAGCTGCGG             |
| GCG                  | GGAACCGGAACAACATTGC              | CCTTCTCGGCCTTTCAC                |
| CCK                  | AGAGCGGCGTATGTCTGTGC             | GATGTATCGCGCTAGCAGTGC            |
| T1R2                 | (QT00142639, Qiagen)             |                                  |
| FFAR1                | (QT00308833, Qiagen)             |                                  |
| GAPDH                | (QT01658692, Qiagen)             |                                  |
| <b>Human primers</b> |                                  |                                  |
| FFAR1                | CAACGTCCTGGCCATCCG               | GTCGGAGCAGCCCAGGTTC              |
| FFAR3                | ATCACTGGTTCGTCTTCTCGG            | AGGCGGTCAGGTTGAGCA               |
| FFAR2                | CAAGATCATCGAGGCTGC               | AAGCCACTCCCAGGTAGC               |
| GPR84                | AATGTGCTCACCTACTGGC              | GCGTGCACTAGAGGAGATCAG            |
| GPR120               | TCTCTGCGTCTTCTCCG                | GTGGGCCAAATCAGTGTG               |
| T1R1                 | GAGATAAACTCCACGGC                | CACTCTCAGCGTGGCATACT             |
| T1R3                 | TATAGCGTGGCCAGGC                 | GTTCTCCAGGAGCTGCCAG              |
| CaSR                 | TTCCCCAGGTCAGTTATGC              | AATTGTGCCACCCAGTT                |
| GPR93                | GACGAGCTGTGGAAAGGC               | CGAAGCACAGCAGGAAGAT              |
| T1R2                 | (QT01026508, Qiagen)             |                                  |
| mGluR4               | (QT00060396, Qiagen)             |                                  |

GPR119 (QT01030848, Qiagen)

TGR5 (QT00209594, Qiagen)

$\beta$ actin (QT01680476, Qiagen)

---

**SUPPLEMENTARY TABLE 2.** Antibodies used for immunohistochemistry.

| <b>Protein</b> | <b>Antibody details</b>                                 | <b>Dilution</b> |
|----------------|---------------------------------------------------------|-----------------|
| T1R2           | rabbit polyclonal (SC-50306, Santa Cruz Biotechnology)  | 1:200           |
| GPR93          | rabbit polyclonal (SC-135237, Santa Cruz Biotechnology) | 1:100           |
| GPRC6A         | rabbit polyclonal (SC-98332, Santa Cruz Biotechnology)  | 1:50            |
| CaSR           | mouse monoclonal (AB-19347, Abcam)                      | 1:200           |
| FFAR3          | rabbit polyclonal (SC-98332, Santa Cruz Biotechnology)  | 1:80            |
| CCK            | goat polyclonal (SC-21616, Santa Cruz Biotechnology)    | 1:200           |
| GLP-1          | goat polyclonal (SC-7782, Santa Cruz Biotechnology)     | 1:200           |
| PYY (mouse)    | guinea pig polyclonal (PAB17185, Abnova)                | 1:6000          |
| PYY (human)    | rabbit polyclonal (P3285-10, US Biological)             | 1:200           |
| 5-HT           | mouse polyclonal (5HT-H209, Dako)                       | 1:200           |
| pERK           | rabbit monoclonal (4370, Cell Signalling)               | 1:200           |
| pCamKII        | rabbit polyclonal (V1111, Promega)                      | 1:100           |
